# Supplementary material for: Modifications of H3K9me2, H3K36me3 and H4K20me2 may be involved in arsenic-induced genetic damage
Source: Royal Society of Chemistry journal article supplement (doi:10.1039/c6tx00117c), 2016-01-01
Supplement: c6tx00117c1.pdf [file c6tx00117c1.pdf]

**Table S1. The influence of sex on the objects of study of the genetics damage and histone methylation in Controls ( $\bar{x}\pm SD$ , adjusted  $\bar{x}\pm SE$ )**

| Variables                            | Controls(n=97) |              | P-value            | Test statistic |
|--------------------------------------|----------------|--------------|--------------------|----------------|
|                                      | male(n=28)     | female(n=69) |                    |                |
| <b>Genetic damage</b>                |                |              |                    |                |
| Micronucleus (‰)                     | 1.21±1.13      | 1.18±0.92    | 0.874 <sup>a</sup> | t=0.158        |
| Micronucleus age adjusted (‰)        | 1.19±0.18      | 1.19±0.12    | 0.992 <sup>b</sup> | F=0.001        |
| Olive tail Moment                    | 2.12±5.48      | 3.43±6.56    | 0.492 <sup>a</sup> | t=1.322        |
| Olive tail Moment age adjusted       | 2.10±2.74      | 3.45±1.33    | 0.220 <sup>b</sup> | F=1.545        |
| Tail DNA%                            | 2.07±1.83      | 4.20±6.58    | 0.240 <sup>a</sup> | t=1.190        |
| Tail DNA% age adjusted               | 2.17±1.53      | 3.88±1.15    | 0.269 <sup>b</sup> | F=1.250        |
| <b>Histone modifications (µg/mL)</b> |                |              |                    |                |
| H3K9me2                              | 0.59±0.23      | 0.55±0.23    | 0.634 <sup>a</sup> | t=0.478        |
| H3K9me2 age adjusted                 | 0.59±0.05      | 0.55±0.03    | 0.688 <sup>b</sup> | F=0.163        |
| H3K36me3                             | 0.50±0.18      | 0.55±0.35    | 0.224 <sup>a</sup> | t=1.225        |
| H3K36me3 age adjusted                | 0.51±0.06      | 0.59±0.04    | 0.838 <sup>b</sup> | F=0.042        |
| H3K79me2                             | 0.15±0.12      | 0.16±0.14    | 0.555 <sup>a</sup> | t=0.593        |
| H3K79me2 age adjusted                | 0.15±0.02      | 0.16±0.01    | 0.574 <sup>b</sup> | F=0.319        |
| H4K20me1                             | 0.49±0.21      | 0.52±0.29    | 0.725 <sup>a</sup> | t=0.353        |
| H4K20me1 age adjusted                | 0.50±0.06      | 0.52±0.04    | 0.747 <sup>b</sup> | F=0.105        |
| H4K20me2                             | 1.01±0.42      | 0.89±0.36    | 0.503 <sup>a</sup> | t=0.977        |
| H4K20me2 age adjusted                | 1.01±0.08      | 0.89±0.08    | 0.363 <sup>b</sup> | F=0.541        |
| H4K20me3                             | 1.08±0.31      | 1.21±0.78    | 0.503 <sup>a</sup> | t=0.674        |
| H4K20me3 age adjusted                | 1.09±0.16      | 1.21±0.10    | 0.506 <sup>b</sup> | F=0.448        |

a Independent-sample t-test; b General linear model (univariate analysis)

**Table S2. The influence of sex on the objects of study of the genetics damage and histone methylation in Arsenic poisoning group**

( $\bar{x} \pm SD$ , adjusted  $\bar{x} \pm SE$ )

| Variables                                           | Arsenic poisoning group(n=162) |                   | P-value            | Test statistic |
|-----------------------------------------------------|--------------------------------|-------------------|--------------------|----------------|
|                                                     | male(n=91)                     | female(n=71)      |                    |                |
| <b>Genetic damage (mean <math>\pm</math> SD)</b>    |                                |                   |                    |                |
| Micronucleus (‰)                                    | 2.26 $\pm$ 1.58                | 2.03 $\pm$ 1.49   | 0.364 <sup>a</sup> | t=0.911        |
| Micronucleus age adjusted (‰)                       | 2.28 $\pm$ 0.16                | 2.01 $\pm$ 0.19   | 0.285 <sup>b</sup> | F=1.153        |
| Olive tail Moment                                   | 15.35 $\pm$ 13.57              | 15.87 $\pm$ 13.57 | 0.829 <sup>a</sup> | t=0.217        |
| Olive tail Moment age adjusted                      | 15.39 $\pm$ 1.76               | 15.82 $\pm$ 1.82  | 0.855 <sup>b</sup> | F=0.034        |
| Tail DNA%                                           | 12.56 $\pm$ 9.70               | 13.41 $\pm$ 10.16 | 0.628 <sup>a</sup> | t=0.486        |
| Tail DNA% age adjusted                              | 12.58 $\pm$ 1.12               | 13.38 $\pm$ 1.34  | 0.649 <sup>b</sup> | F=0.209        |
| <b>Histone modifications (<math>\mu</math>g/mL)</b> |                                |                   |                    |                |
| H3K9me2                                             | 0.34 $\pm$ 0.27                | 0.33 $\pm$ 0.26   | 0.783 <sup>a</sup> | t=0.276        |
| H3K9me2 age adjusted                                | 0.34 $\pm$ 0.03                | 0.33 $\pm$ 0.03   | 0.790 <sup>b</sup> | F=0.074        |
| H3K36me3                                            | 0.99 $\pm$ 0.80                | 1.07 $\pm$ 0.78   | 0.848 <sup>a</sup> | t=0.192        |
| H3K36me3 age adjusted                               | 1.00 $\pm$ 0.08                | 1.07 $\pm$ 0.10   | 0.838 <sup>b</sup> | F=0.042        |
| H3K79me2                                            | 0.23 $\pm$ 0.31                | 0.26 $\pm$ 0.48   | 0.357 <sup>a</sup> | t=0.924        |
| H3K79me2 age adjusted                               | 0.23 $\pm$ 0.03                | 0.26 $\pm$ 0.04   | 0.345 <sup>b</sup> | F=0.896        |
| H4K20me1                                            | 0.59 $\pm$ 0.30                | 0.57 $\pm$ 0.24   | 0.612 <sup>a</sup> | t=0.509        |
| H4K20me1 age adjusted                               | 0.59 $\pm$ 0.04                | 0.58 $\pm$ 0.04   | 0.256 <sup>b</sup> | F=0.019        |
| H4K20me2                                            | 0.77 $\pm$ 0.28                | 0.70 $\pm$ 0.23   | 0.456 <sup>a</sup> | t=0.748        |
| H4K20me2 age adjusted                               | 0.77 $\pm$ 0.04                | 0.70 $\pm$ 0.04   | 0.392 <sup>b</sup> | F=0.740        |
| H4K20me3                                            | 1.19 $\pm$ 0.53                | 1.13 $\pm$ 0.42   | 0.562 <sup>a</sup> | t=0.581        |
| H4K20me3 age adjusted                               | 1.19 $\pm$ 0.06                | 1.14 $\pm$ 0.07   | 0.594 <sup>b</sup> | F=0.285        |

a Independent-sample t-test; b General linear model (univariate analysis)

**Table S3. The influence of age on the objects of study of the genetics damage and histone methylation in controls**

| Variables                                       | Controls(n=97) |                  |            | P-value            | Test statistic |
|-------------------------------------------------|----------------|------------------|------------|--------------------|----------------|
|                                                 | ≤40(n=50)      | 40<age≤51( n=28) | >51( n=19) |                    |                |
| <b>Genetic damage (mean ± SD)</b>               |                |                  |            |                    |                |
| Micronucleus (‰)                                | 1.02±0.88      | 1.18±0.92        | 1.47±1.08  | 0.106 <sup>a</sup> | t=1.975        |
| Olive tail Moment                               | 5.50±10.22     | 1.75±2.50        | 1.24±0.80  | 0.120 <sup>a</sup> | t=2.218        |
| Tail DNA%                                       | 5.26±8.71      | 2.54±2.50        | 2.73±2.02  | 0.274 <sup>a</sup> | t=1.330        |
| <b>Histone modifications (mean ± SD, µg/mL)</b> |                |                  |            |                    |                |
| H3K9me2                                         | 0.53±0.26      | 0.57±0.31        | 0.600±0.20 | 0.292 <sup>a</sup> | t=1.246        |
| H3K36me3                                        | 0.61±0.28      | 0.49±0.36        | 0.54±0.31  | 0.318 <sup>a</sup> | t=1.161        |
| H3K79me2                                        | 0.15±0.12      | 0.14±0.11        | 0.13±0.09  | 0.815 <sup>a</sup> | t=0.205        |
| H4K20me1                                        | 0.51±0.26      | 0.59±0.31        | 0.41±0.19  | 0.265 <sup>a</sup> | t=1.360        |
| H4K20me2                                        | 0.92±0.39      | 1.03±0.37        | 0.89±0.46  | 0.433 <sup>a</sup> | t=0.849        |
| H4K20me3                                        | 1.13±0.69      | 1.26±0.74        | 1.18±0.58  | 0.805 <sup>a</sup> | t=0.217        |

<sup>a</sup> one-way analysis of variance

**Table S4. The influence of age on the objects of study of the genetics damage and histone methylation in Arsenic poisoning group**

| Variables                                       | Arsenic poisoning group(n=162) |                  |             | P-value            | Test statistic |
|-------------------------------------------------|--------------------------------|------------------|-------------|--------------------|----------------|
|                                                 | ≤40(n=50)                      | 40<age≤51( n=28) | >51( n=19)  |                    |                |
| <b>Genetic damage (mean ± SD)</b>               |                                |                  |             |                    |                |
| Micronucleus (‰)                                | 1.98±1.12                      | 2.30±1.40        | 2.41±1.70   | 0.198 <sup>a</sup> | t=1.870        |
| Olive tail Moment                               | 16.64±13.16                    | 11.60±9.37       | 16.00±14.61 | 0.357 <sup>a</sup> | t=1.039        |
| Tail DNA%                                       | 13.95±9.90                     | 10.22±7.29       | 12.94±10.50 | 0.361 <sup>a</sup> | t=1.026        |
| <b>Histone modifications (mean ± SD, µg/mL)</b> |                                |                  |             |                    |                |
| H3K9me2                                         | 0.32±0.28                      | 0.34±0.27        | 0.40±0.29   | 0.318 <sup>a</sup> | t=1.155        |
| H3K36me3                                        | 1.01±0.93                      | 0.99±0.67        | 0.91±0.67   | 0.830 <sup>a</sup> | t=0.186        |
| H3K79me2                                        | 0.25±0.12                      | 0.23±0.33        | 0.22±0.36   | 0.140 <sup>a</sup> | t=1.994        |
| H4K20me1                                        | 0.56±0.23                      | 0.66±0.27        | 0.54±0.28   | 0.100 <sup>a</sup> | t=2.357        |
| H4K20me2                                        | 0.73±0.18                      | 0.77±0.30        | 0.71±0.26   | 0.823 <sup>a</sup> | t=0.195        |
| H4K20me3                                        | 1.21±0.55                      | 1.15±0.41        | 1.14±0.52   | 0.854 <sup>a</sup> | t=0.159        |

<sup>a</sup> one-way analysis of variance
